# Supplementary material for: THC and CBD Fingerprinting of an Elite Cannabis Collection from Iran: Quantifying Diversity to Underpin Future Cannabis Breeding
Source: MDPI journal article supplement (doi:10.3390/plants11010129), 2022-01-04
Supplement: s1 [file s1]

Supplementary Information

THC and CBD fingerprinting of an elite cannabis collection from Iran: quantifying diversity to underpin future cannabis breeding

Mahboubeh Mostafaei Dehnavi, Ali Ebadi, Afshin Peirovi, Gail Taylor, and Seyed Alireza Salami

Supplementary Tables

Table S1. The information of 161 cannabis genotypes analyzed and particular climatic and geographical conditions.

| Province               | region     | Population ID | Individual number | Elevation (m) | Longitude (E) | Latitude (N) | Wind Speed | Avg. annual temp. (C) | Avg. annual min temp. (C) | Avg. annual max temp. (C) | Avg. annual relative humidity | Avg. annual minimum relative humidity | Avg. annual maximum relative humidity | Sunshine duration | Dew Point | Avg. annual precipitation (mm) |
|------------------------|------------|---------------|-------------------|---------------|---------------|--------------|------------|-----------------------|---------------------------|---------------------------|-------------------------------|---------------------------------------|---------------------------------------|-------------------|-----------|--------------------------------|
| Zanjan                 | Abhar      | Abh-01        | 9                 | 1543          | 49°03'        | 36°28'       | 2.80       | 12.39                 | 5.98                      | 18.85                     | 51.85                         | 33.32                                 | 71.95                                 | 8.01              | 1.003     | 301.31                         |
| Arak                   | Arak       | Ark-01        | 9                 | 1722          | 49°42'        | 34°04'       | 1.61       | 14.04                 | 7.27                      | 20.99                     | 45.49                         | 29.49                                 | 63.20                                 | 8.12              | -0.22     | 297.75                         |
| Ardabil                | Ardabil    | Ard-01        | 6                 | 1339          | 48°29'        | 38°24'       | 3.81       | 9.12                  | 3.23                      | 15.68                     | 73.16                         | 52.68                                 | 90.51                                 | 6.95              | 3.78      | 273.67                         |
| Kerman                 | Bam        | Bam-01        | 10                | 1068          | 58°14'        | 29°09'       | 3.07       | 23.74                 | 17.98                     | 29.89                     | 25.26                         | 15.56                                 | 36.79                                 | 9.17              | 0.29      | 54.05                          |
| Kordistan              | Baneh      | Ban-01        | 10                | 1503          | 45°53'        | 35°59'       | 3.97       | 14.26                 | 8.81                      | 18.94                     | 44.71                         | 32.44                                 | 59.05                                 | 7.94              | -0.16     | 660.88                         |
| South Khorasan         | Boshrouyeh | Bsh-01        | 10                | 881           | 57°43'        | 34°03'       | 1.44       | 21.07                 | 11.53                     | 27.16                     | 34.27                         | 23.30                                 | 50.65                                 | 8.48              | 1.81      | 79.98                          |
| Khuzestan              | Dezful 1   | Dez-01        | 9                 | 144           | 48°42'        | 32°38'       | 1.35       | 24.56                 | 16.88                     | 32.54                     | 48.43                         | 28.32                                 | 67.81                                 | 7.61              | 10.36     | 389.40                         |
| Khuzestan              | Dezful 2   | Dez-02        | 8                 | 144           | 48°42'        | 32°38'       | 1.35       | 24.56                 | 16.88                     | 32.54                     | 48.43                         | 28.32                                 | 67.81                                 | 7.61              | 10.36     | 389.40                         |
| Kerman                 | Kerman     | Krmn-01       | 7                 | 1761          | 56°58'        | 30°15'       | 2.84       | 17.01                 | 7.56                      | 25.36                     | 31.68                         | 17.22                                 | 50.05                                 | 9.17              | -2.95     | 123.43                         |
| Kermanshah             | Kermanshah | Krsh-01       | 7                 | 1389          | 47°03'        | 34°19'       | 2.48       | 15.51                 | 6.99                      | 23.60                     | 43.19                         | 24.93                                 | 63.06                                 | 7.98              | -0.27     | 402.63                         |
| Hamadan                | Nahavand   | Nhv-01        | 8                 | 1666          | 48°25'        | 34°15'       | 2.25       | 14.72                 | 6.56                      | 21.28                     | 45.36                         | 29.58                                 | 64.64                                 | 8.80              | 0.85      | 385.29                         |
| West Azerbaijan        | Naqadeh    | Naq-01        | 7                 | 1324          | 45°22'        | 36°57'       | 2.68       | 14.08                 | 5.90                      | 19.33                     | 55.07                         | 40.87                                 | 74.16                                 | 8.05              | 3.98      | 323.95                         |
| West Azerbaijan        | Piranshahr | Pir-01        | 7                 | 1572          | 45°08'        | 36°42'       | 2.24       | 13.28                 | 6.99                      | 18.38                     | 52.18                         | 36.77                                 | 70.55                                 | 7.88              | 1.91      | 640.61                         |
| Qazvin                 | Qazvin     | Qzv-01        | 10                | 1315          | 49°86'        | 36°47'       | 1.57       | 13.91                 | 7.19                      | 21.62                     | 52.41                         | 30.56                                 | 74.66                                 | 8.19              | 2.46      | 311.85                         |
| Khuzestan              | Ramhormoz  | Rmh-01        | 6                 | 179           | 49°59'        | 31°27'       | 1.99       | 27.67                 | 19.96                     | 33.20                     | 35.93                         | 24.58                                 | 50.90                                 | 8.56              | 7.68      | 280.49                         |
| Hamadan                | Samen      | Sam-01        | 6                 | 1858          | 48°70'        | 34°20'       | 2.93       | 13.53                 | 6.22                      | 20.61                     | 44.18                         | 27.14                                 | 63.21                                 | 8.48              | -0.86     | 324.79                         |
| Kurdistan              | Sanandaj   | San-01        | 9                 | 1464          | 46°99'        | 35°31'       | 1.99       | 14.00                 | 6.12                      | 22.25                     | 47.40                         | 25.83                                 | 70.73                                 | 8.22              | 0.04      | 375.10                         |
| Kurdistan              | Saqez      | Sqz-01        | 7                 | 1480          | 46°26'        | 36°24'       | 2.26       | 11.20                 | 2.77                      | 18.94                     | 53.74                         | 34.87                                 | 73.73                                 | 8.17              | 0.09      | 439.37                         |
| Kerman                 | Sirjan     | Sir-01        | 6                 | 1754          | 55°68'        | 29°43'       | 2.58       | 17.81                 | 9.47                      | 25.36                     | 34.56                         | 20.07                                 | 52.13                                 | 9.37              | -0.31     | 138.52                         |
| Sistan and Baluchestan | Zahedan    | Zah-01        | 10                | 1352          | 60°86'        | 29°49'       | 3.21       | 19.30                 | 10.89                     | 27.11                     | 28.88                         | 16.00                                 | 28.9                                  | 9.26              | -2.29     | 73.58                          |

Supplementary Figures

(a)

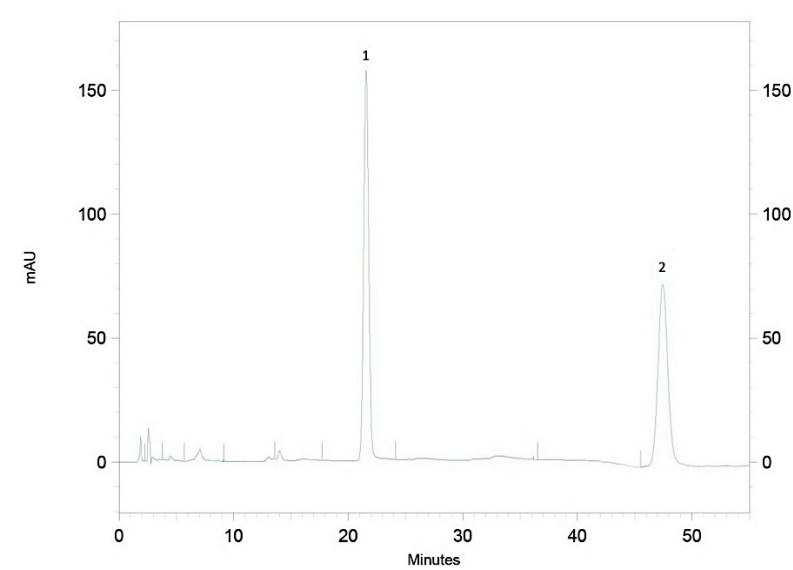

(b)

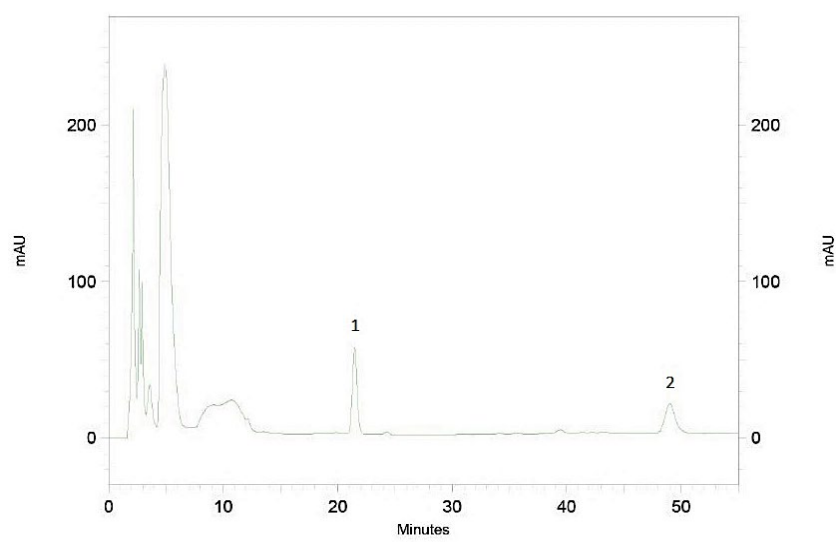

**Figure S1.** (a) HPLC chromatograms of standards solution; (b) methanolic extract of female bud of *C. sativa*: peak 1: cannabidiol (CBD), peak 2:  $\Delta^9$ -tetrahydrocannabinol ( $\Delta^9$ -THC).
